# Supplementary material for: Green synthesis of a plant-derived protein protected copper quantum cluster for intrauterine device application
Source: Royal Society of Chemistry journal article supplement (doi:10.1039/c8an00438b), 2018-01-01
Supplement: c8an00438b1.pdf [file c8an00438b1.pdf]

## Electronic Supplementary Information

### Green Synthesis of Plant-Derived Protein Protected Copper Quantum Cluster for Intrauterine Device Application

Meegle S. Mathew<sup>1</sup>, Joyal Davis<sup>2</sup> & Kuruvilla Joseph<sup>1\*</sup>

<sup>1</sup>Department of Chemistry, Indian Institute of Space Science and Technology, Valiamala, Thiruvananthapuram,  
Kerala, 695547, India. E-mail: kjoseph.iist@gmail.com.

<sup>2</sup>Department of Chemistry, Indian Institute of Science Education and Research, Mohali, Punjab. India

**Table S1.** Quantum Yield Calculation

| Sample | Exc.<br>$\lambda$ (nm) | $\Phi_0$ | $A_0$ | $I_0$             | $n_0$ | $A_s$ | $I_s$             | $n_s$ | $\Phi_s$ (%) |
|--------|------------------------|----------|-------|-------------------|-------|-------|-------------------|-------|--------------|
| CuQC   | 325                    | 0.54     | 0.063 | $2.3 \times 10^8$ | 1.33  | 0.07  | $1.2 \times 10^7$ | 1.33  | 2.57         |

Where,  $\Phi_0$ : Reference QY,  $\Phi_s$ : Sample QY,  $I_0$  and  $A_0$  are the absorbance and intensity of reference respectively,  $I_s$  and  $A_s$  are intensity and absorbance of the sample respectively,  $n_0$  and  $n_s$  are the refractive index of the solvent used reference and sample respectively.

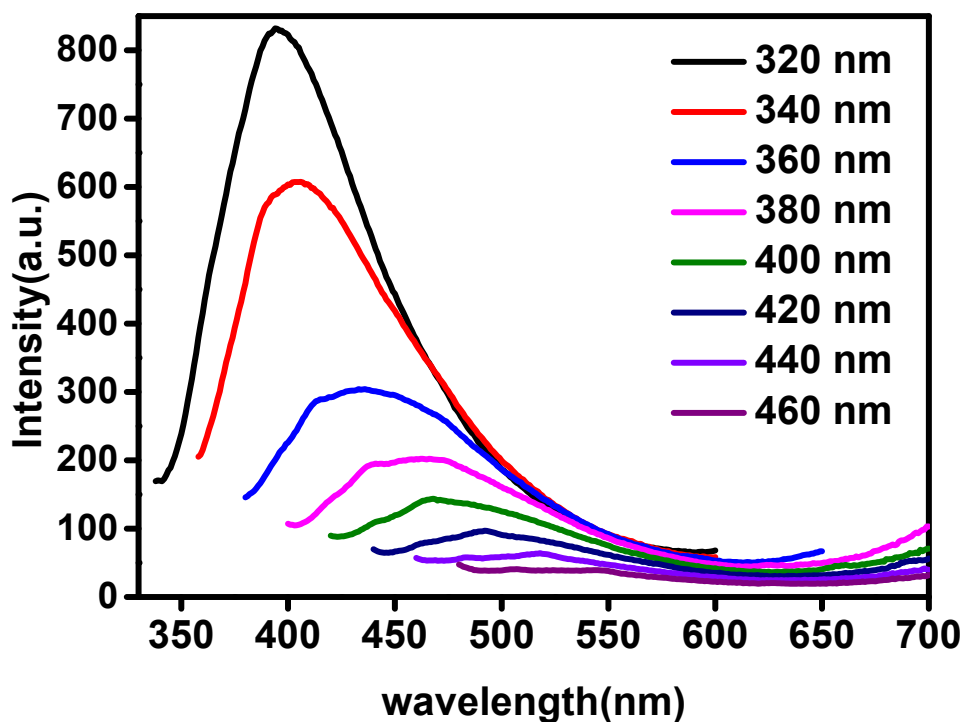

**Figure S1.** Excitation dependent emission spectra of CuQC

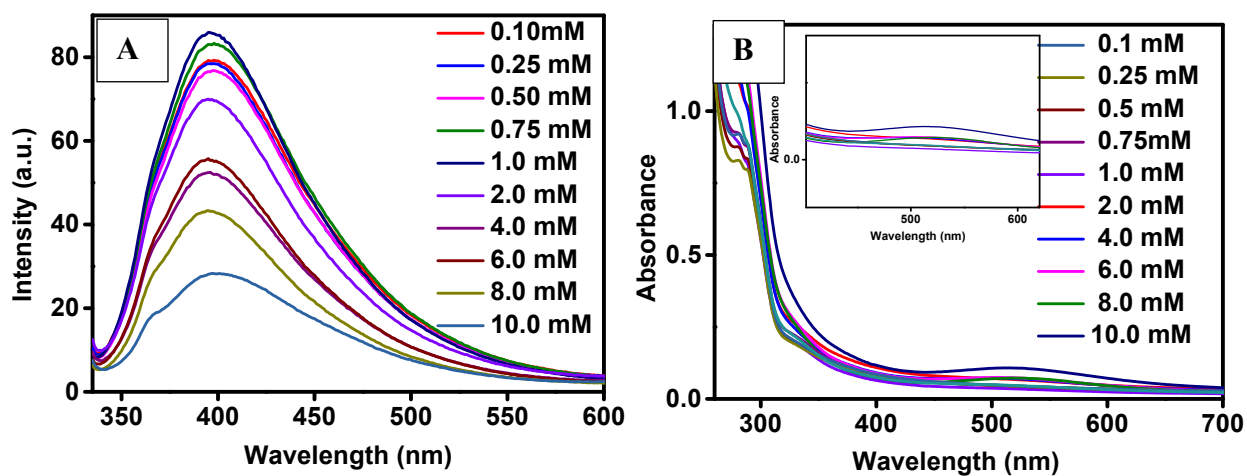

**Figure S2.** Fluorescence emission spectra ( $\lambda_{\text{ex}} = 320 \text{ nm}$ ) and absorption spectra of evaluation of clusters with various concentration of  $\text{CuSO}_4$ . Concentration of gluten (25 mg/mL) was maintained as constant. The spectra were collected after 7 hour reaction at 55 °C.

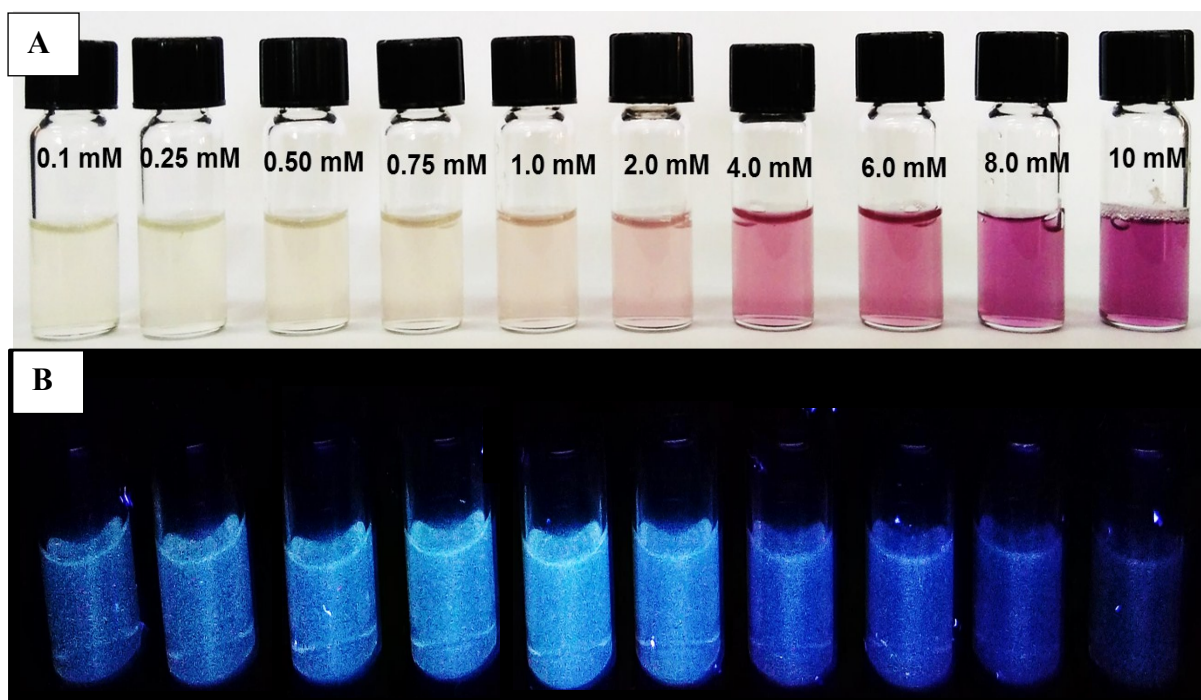

**Figure S3:** Photograph of CuQC formation at various concentration of  $\text{CuSO}_4$  under visible light and UV light ( $\lambda_{\text{ex}} = 365 \text{ nm}$ )

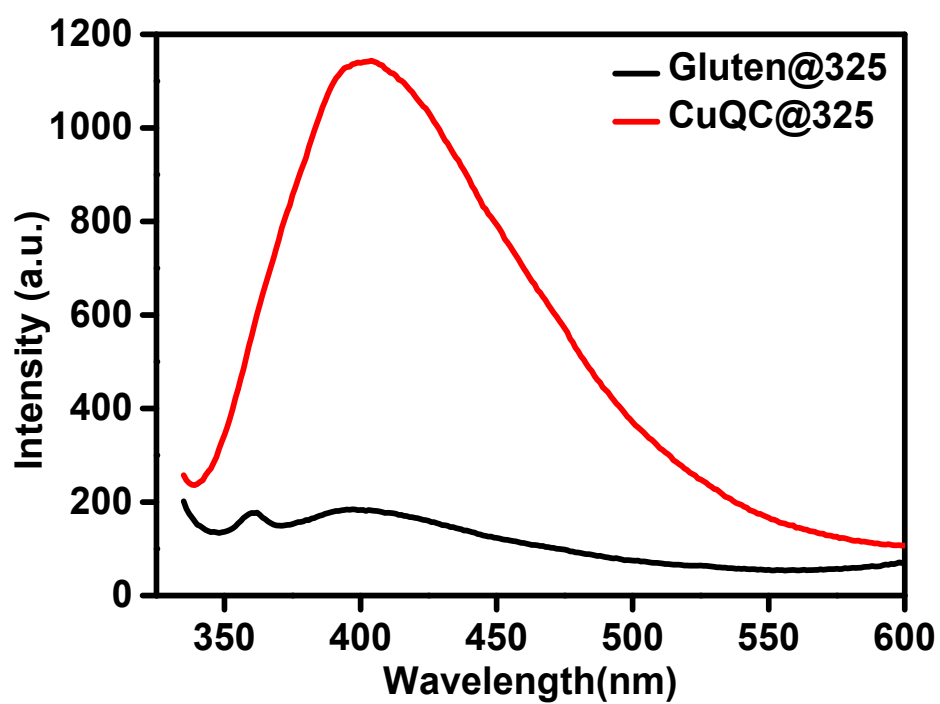

**Figure S4.** Fluorescence spectra of gluten (black trace) and CuQC (red trace) ( $\lambda_{\text{ex}} = 325 \text{ nm}$ ).

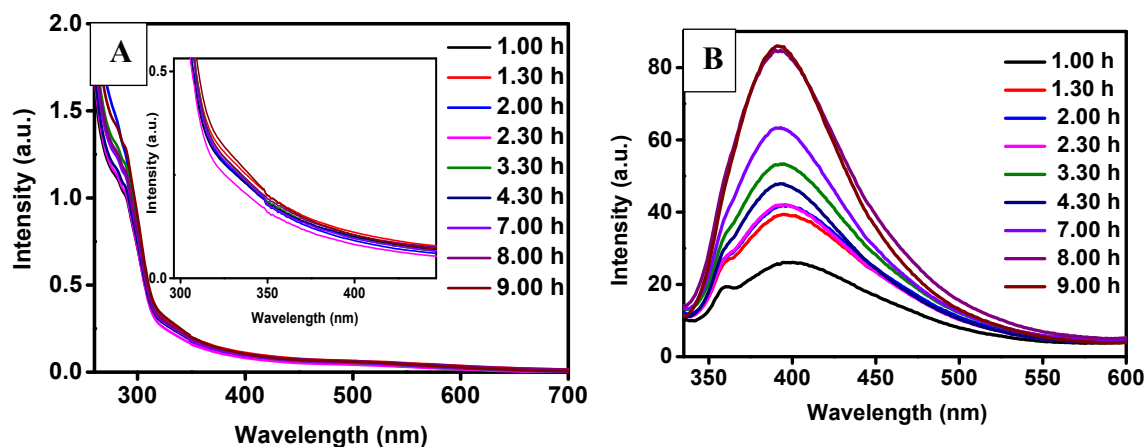

**Figure S5.** (A) Absorption spectra and (B) emission spectra ( $\lambda_{\text{ex}} = 320$  nm) at different time points during their synthesis. Concentration of  $\text{CuSO}_4$  (1 mM) and gluten (25 mg/mL) maintained as constant. The spectra were collected with different time interval stars from 1h to 9 h.

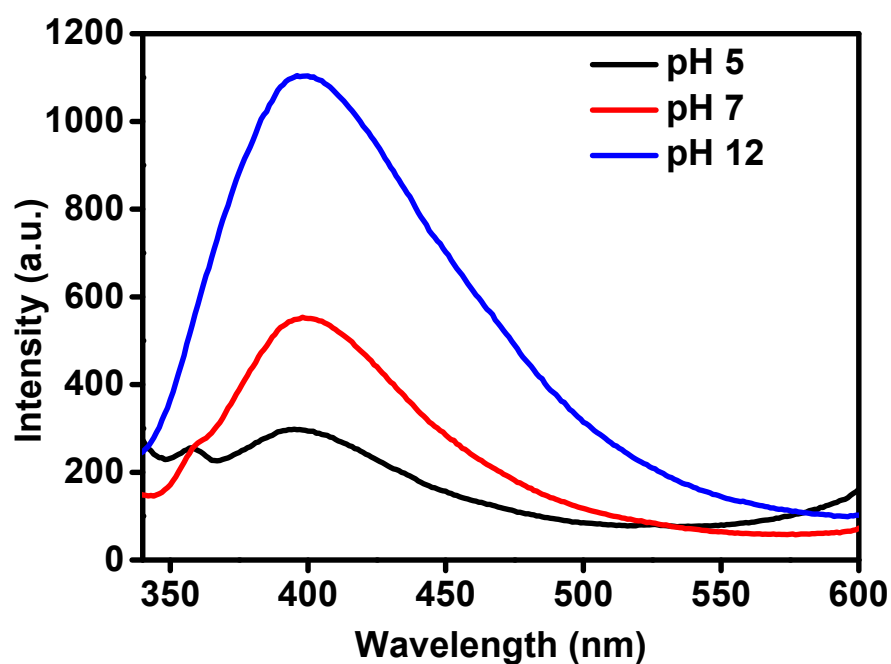

**Figure S6:** Fluorescent emission spectra ( $\lambda_{\text{ex}} = 325 \text{ nm}$ ) for CuQC synthesized at different pHs.

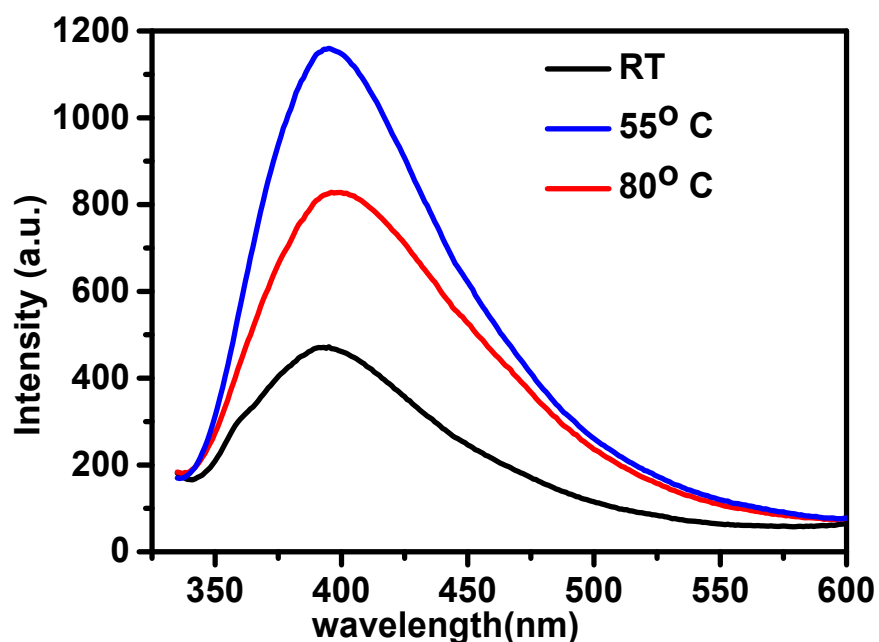

**Figure S7.** Fluorescence emission spectra ( $\lambda_{\text{ex}} = 325 \text{ nm}$ ) of evaluation of clusters with various temperature. Concentration of gluten (25 mg/ml) and gold (5 mM) were maintained as constant. The spectra were collected after 8 hour reaction.

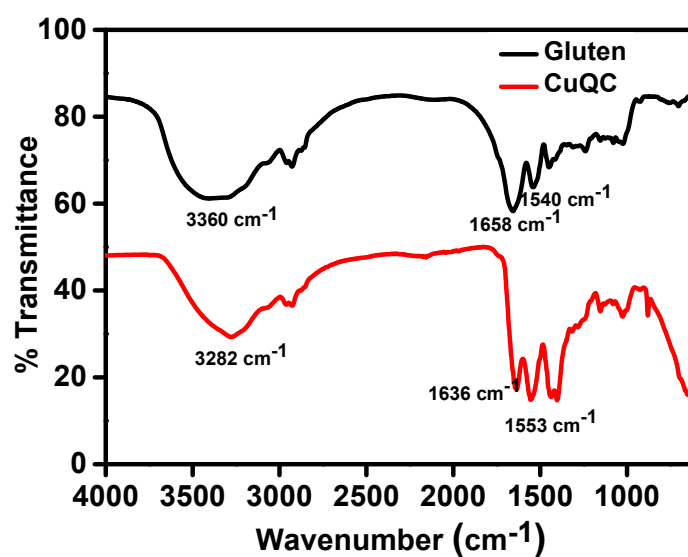

**Figure S8:** FTIR spectra of gluten and CuQC

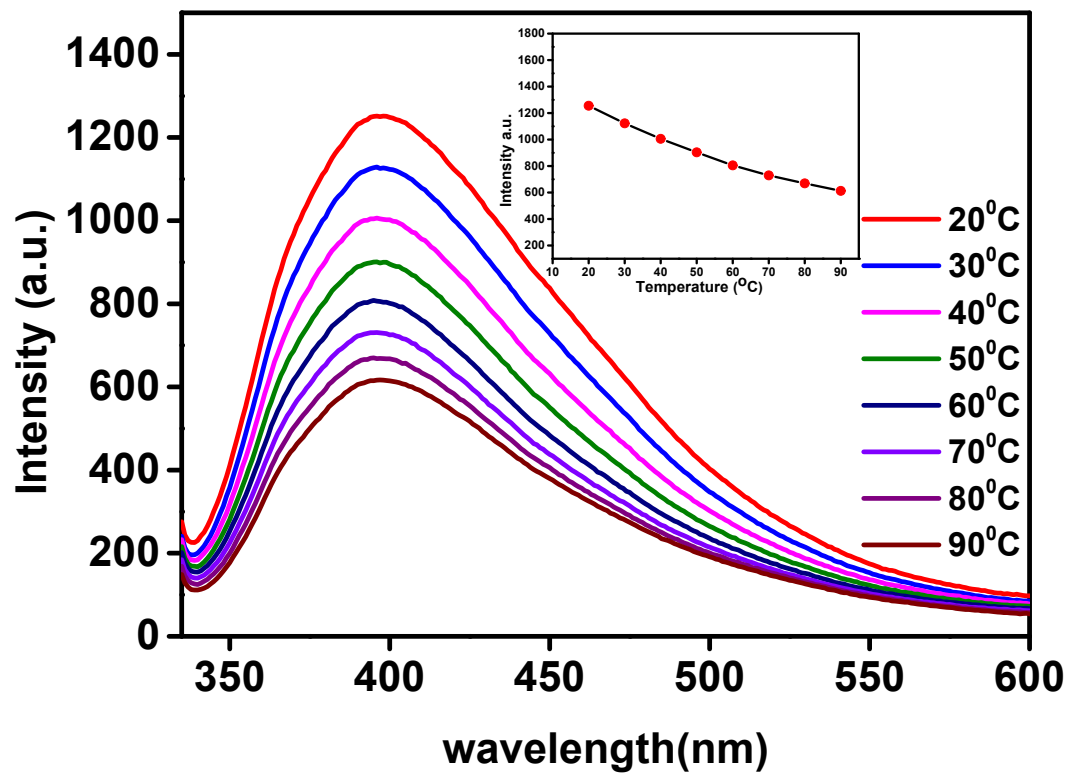

**Figure S9.** Fluorescent Emission spectra of CuQC subjected to various temperatures
